# Supplementary material
Source: Springer Nature journal article supplement (https://www.springermedizin.de/resource/supplementary/12943_2013_1521_MOESM6_ESM.pdf/9552440)

**A****a**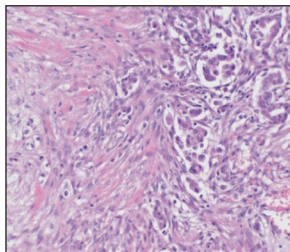**IDC (HE) x200****b**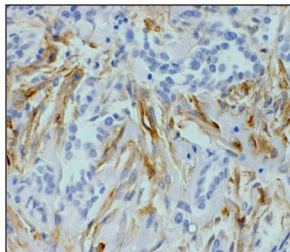**IDC (PDPN) x400****c**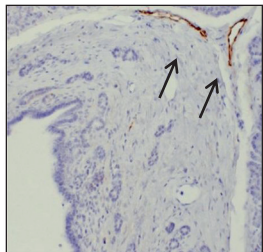**Normal MPD x200****B**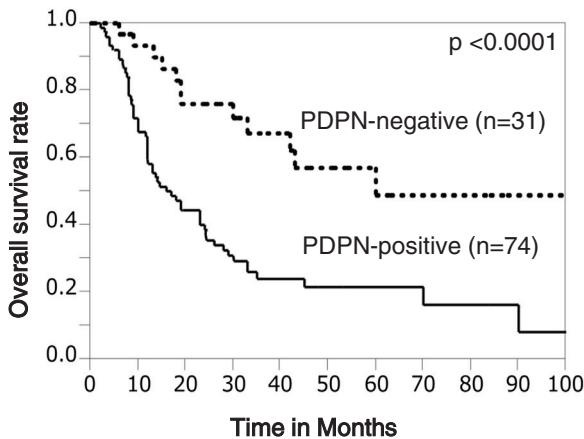**C**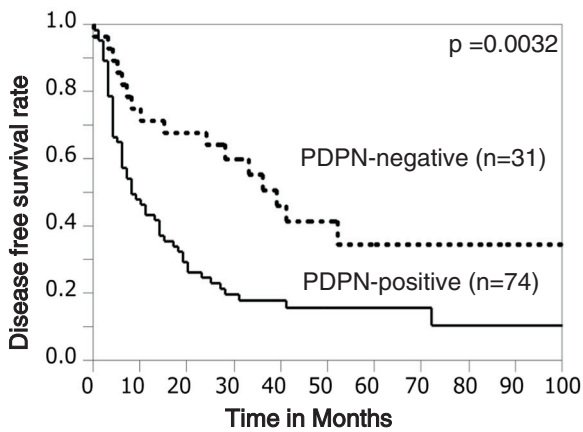

Supplement: MOESM6 [file 9552440]
